# Supplementary material
Source: PubMed Central journal article supplement (PMC7484405)
Supplement: NIHMS1610811-supplement-2.pdf [file NIHMS1610811-supplement-2.pdf]

**A**

```
P_GE (-) : UCAAUGUUUUUUU
F_GE (-) : UCAA-UUAUUUUU
NS1_GE (-) : UCAAUUUAUUUUU
G_GE (-) : UCAAUGAAUUUUU
N_GE (-) : UCAAUUUUUUUUU
M_GE (-) : UCAAUUUUUUUUU
SH_GE (-) : UCAAUUAAUUUUU
L_GE (-) : UCAA-UAAUUUUU
NS2_GE (-) : UCAU-UAAAUUUU
M2_GE (-) : UCAA-UAAAUUUU
          ***          *****
```

Negative-sense gene-end (GE) sequences

**B**

```
P_GE (+) : AGUUACAAAAAAA
F_GE (+) : AGUU-AUAUAAAA
NS1_GE (+) : AGUUAAUAUAAAA
G_GE (+) : AGUUACUUAAAAA
N_GE (+) : AGUUAAUAAAAAA
M_GE (+) : AGUUAAUAAAAAA
SH_GE (+) : AGUUAAUUAAAAA
L_GE (+) : AGUU-AUUAAAAA
NS2_GE (+) : AGUA-AUUUAAAA
M2_GE (+) : AGUU-AUUUAAAA
          ***          *****
```

Positive-sense gene-end (GE) sequences

**Figure S1: The sequence alignments of negative-sense and positive-sense gene-end (GE) of the HRSV genes. Related to STAR Methods.**

- A. The sequence alignment of negative sense GE of HRSV genes, namely, P, F, NS1, G, N, M, SH, L, NS2, and M2. \* denotes the conserved positions among GE sequences.
- B. The sequence alignment of positive sense GE of HRSV genes: P, F, NS1, G, N, M, SH, L, NS2, and M2.

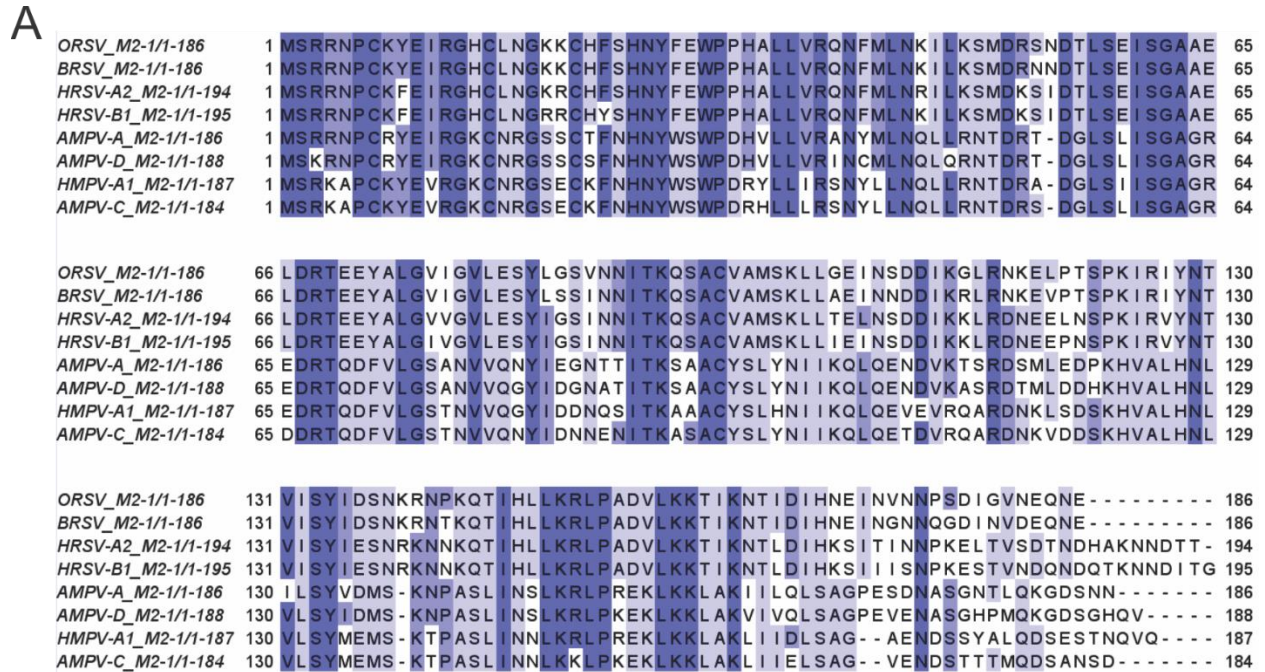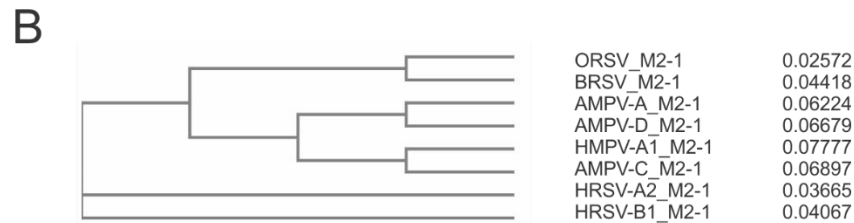

**Figure S2: Multiple sequence alignments of the M2-1 proteins from *Pneumoviridae*. Related to Figures 2 and 4.**

- Multiple sequence alignments of the M2-1 proteins from RSV (ORSV, BRSV, A2 and B1 strains of HRSV) and MPV (A, C, and D strains of AMPV and HMPV). The conservation is highlighted in the degree of the blue color, most conservation with dark blue and least conservation with light blue.
- The Phylogenetic tree of M2-1 from RSV and MPV families. The scores are shown next to each subfamily. A2 and B1 strains of HRSV are distal from the rest of families, including ORSV and BRSV.

**A**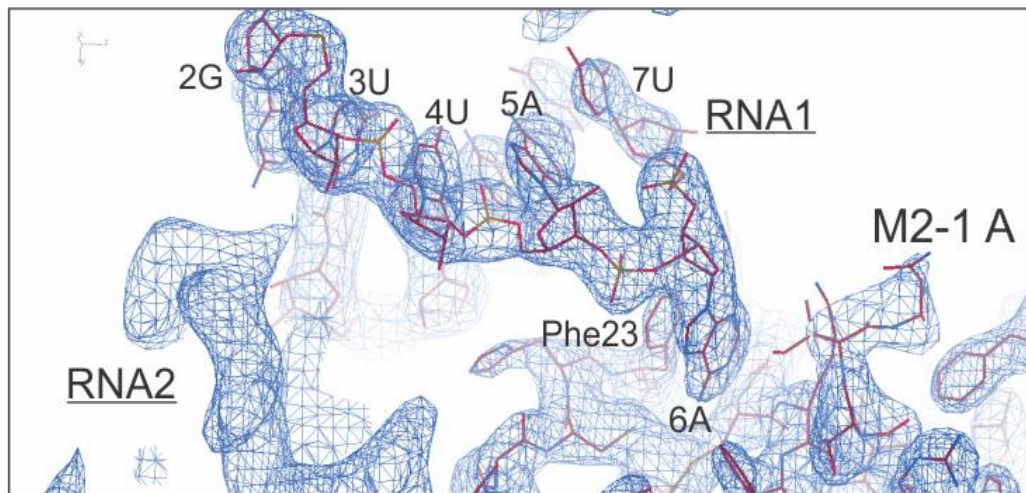**B**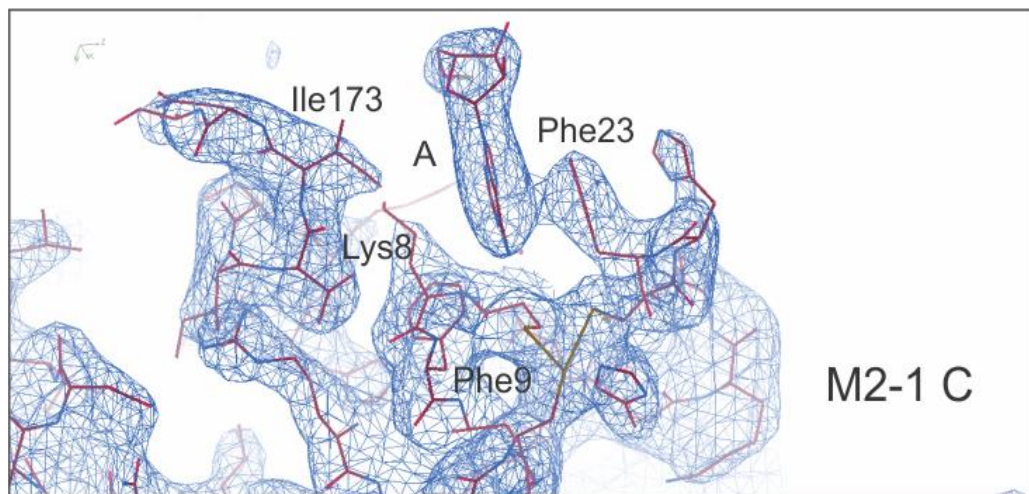

**Figure S3: The representative density maps used for building RNA. Related to Figures 1 and 2.**

- A. The representative electron density  $2F_{\text{obs}} - F_{\text{calc}}$  map (contoured at  $1.5\sigma$ ) shows the electron density of the RNA molecule adjacent to M2-1 protomer A. The meshes show the electron density of the modeled RNA and M2-1.
- B. The representative electron density  $2F_{\text{obs}} - F_{\text{calc}}$  map (contoured at  $1.5\sigma$ ) shows the electron density of the molecule adjacent to M2-1 protomer C. The meshes show the electron density of the modeled RNA and M2-1.

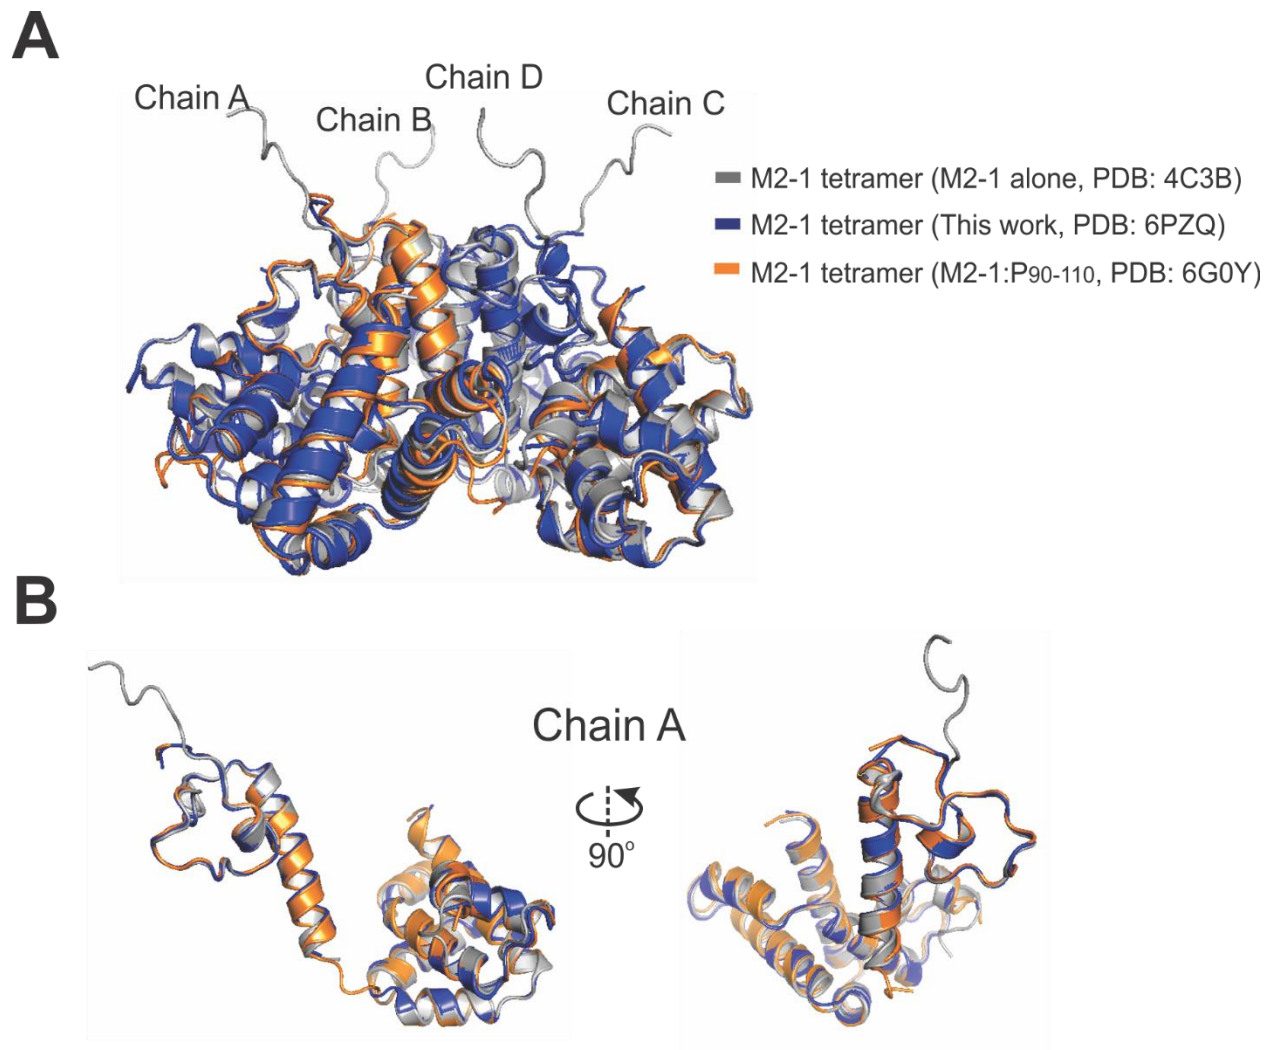

**Figure S4: Superimposition of M2-1 of M2-1:SH7, M2-1 alone, and M2-1:P<sub>90-110</sub>. Related to Figure 1.**

- A. Superimposition of M2-1 of M2-1:SH7 (blue), M2-1 alone (gray, PDB: 4C3B) and M2-1:P90-110 (orange, PDB: 6G0Y).
- B. Superimposition of the chain A of M2-1 from M2-1:SH7, M2-1 alone, and M2-1:P<sub>90-110</sub>. The RMSD are < 0.5 Å.

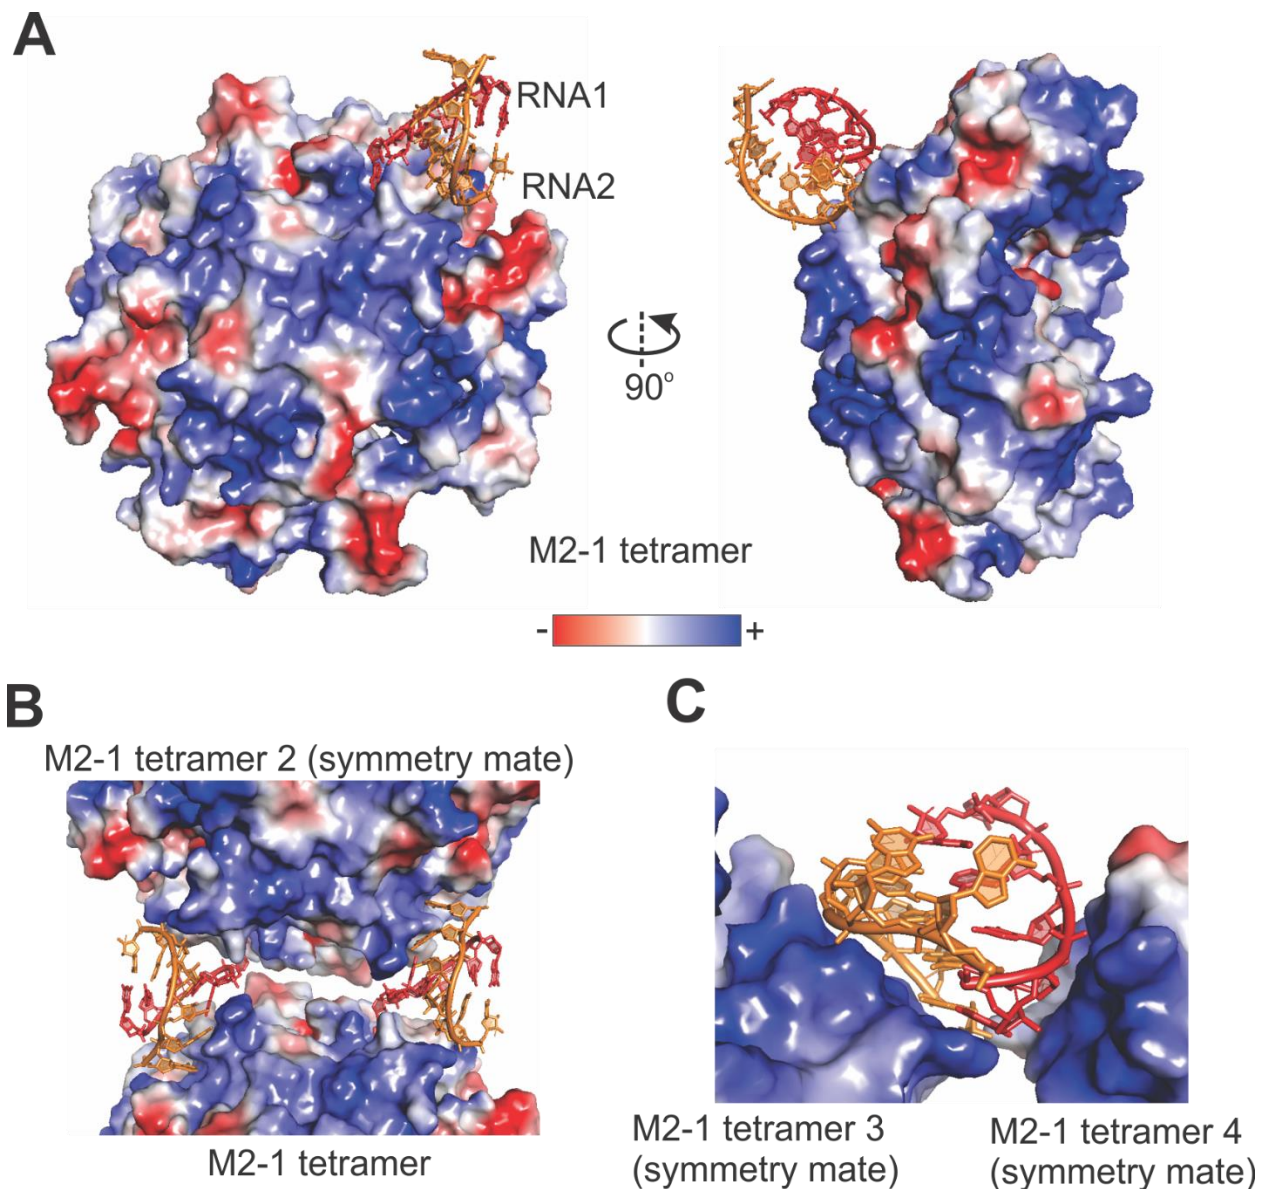

**Figure S5: The electrostatic surface of the M2-1:SH7 complex. Related to Figures 1, 3, and 4.**

- A. Surface representation of the electrostatic potential of the M2-1 in the front view and side view. The negative charge is in red, and the positive charge is in blue (calculated using APBS).
- B. The zoom-in view of the interactions between the zinc-binding domain (ZBD) of two M2-1 tetramers (the upper is the symmetry mate 2) and RNAs.
- C. The zoom-in view of the interactions between the core domain (CD) of two M2-1 tetramers (both are symmetry mates 3 and 4) and RNAs.

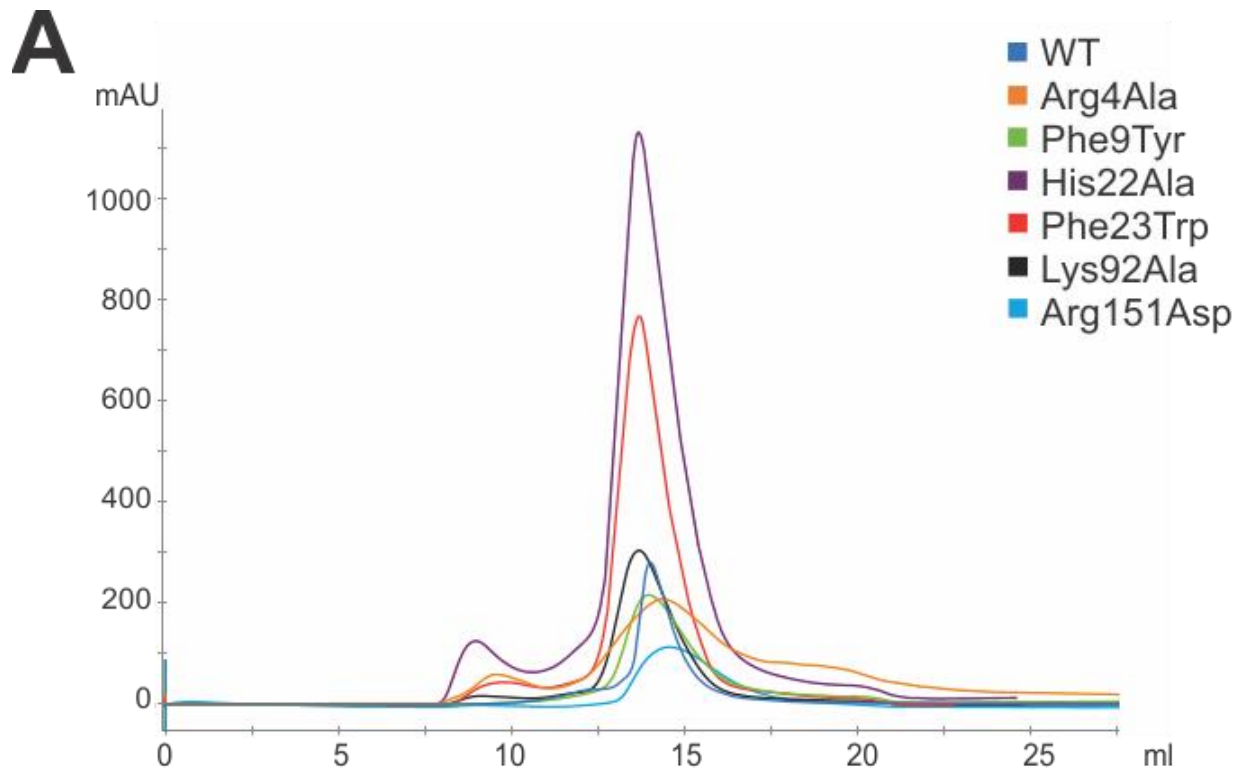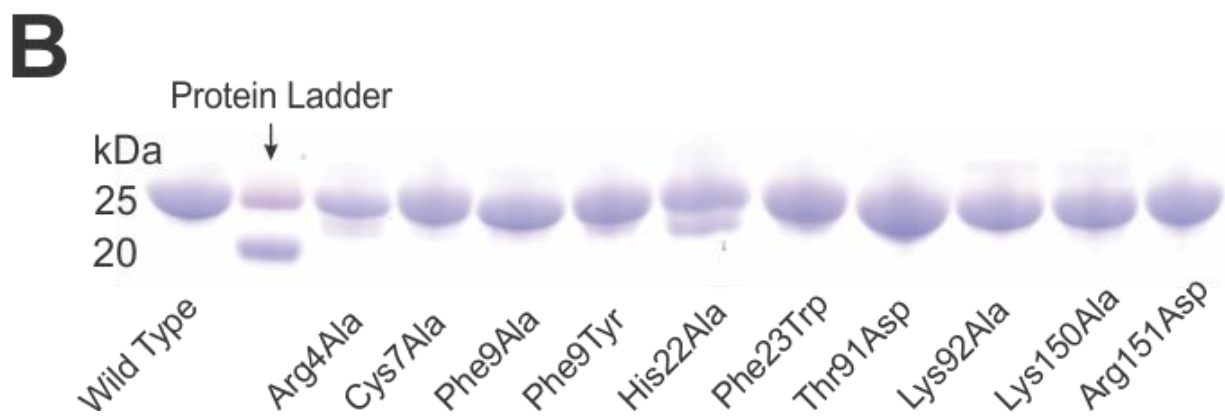

**Figure S6: The wild-type and mutant HRSV M2-1 proteins. Related to Figures 2 and 4.**

A. The representative size exclusion chromatography profiles of wild-type (WT) and mutant HRSV M2-1 proteins, including Arg4Ala, Phe9Tyr, His22Ala, Phe23Trp, Lys92Ala, and Arg151Asp.

B. The SDS-PAGE gel of WT and mutant HRSV M2-1 proteins.

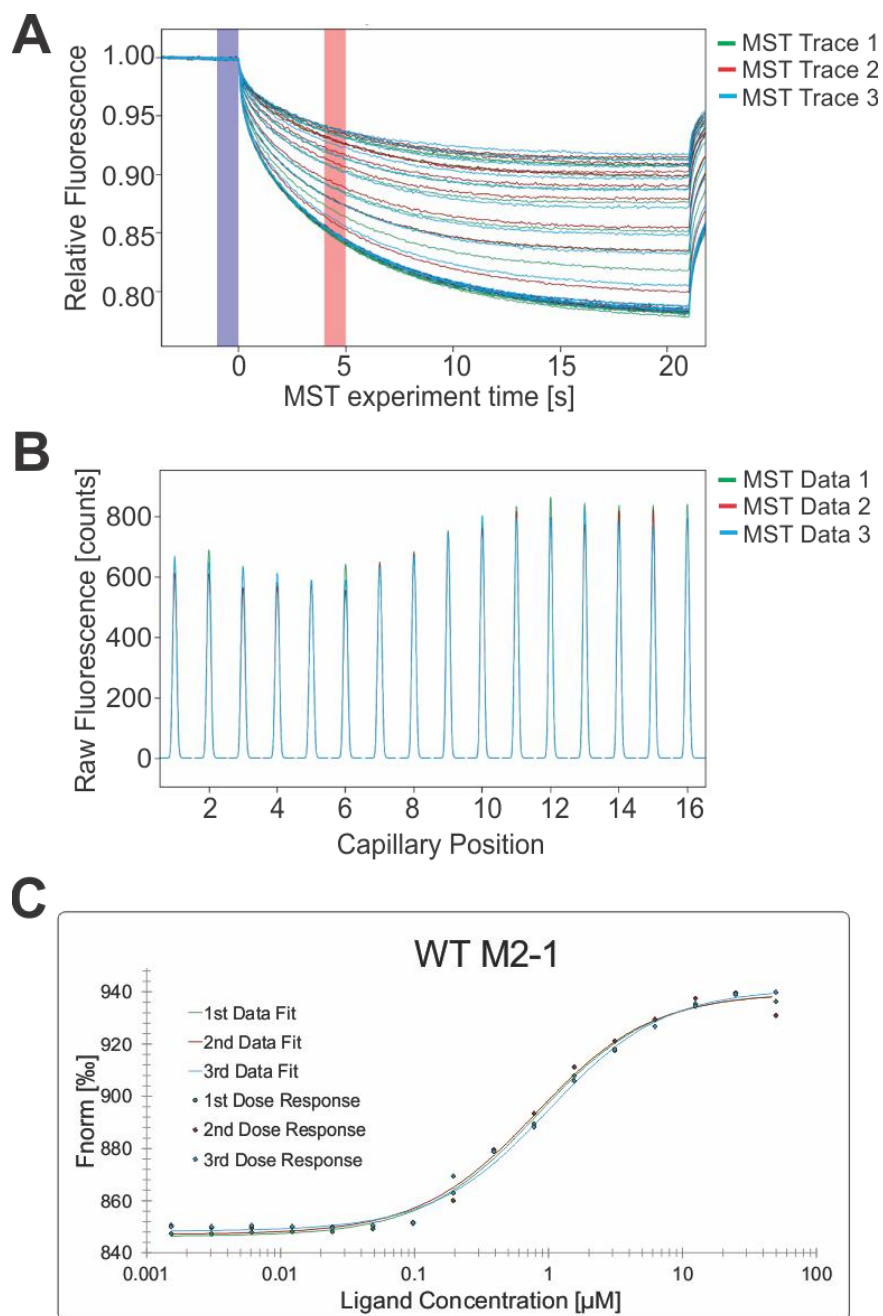

**Figure S7: Affinity analysis of HRSV M2-1 to RNA using MicroScale Thermophoresis (MST) assay. Related to Figures 2 and 4. The data were acquired with a triplicate.**

- A. The representative MicroScale Thermophoresis (MST) experiments show the traces for 16 multiple scans compared using relative fluorescence for WT M2-1 proteins.
- B. The MST data show the raw fluorescence counts for the individual capillary position (a total of 16 capillaries).
- C. The  $K_d$  fitting of the MST data measurements.

| M2-1 Proteins | Kd ( $\mu\text{M}$ ) | Kd ( $\mu\text{M}$ ) Error | Average ( $\mu\text{M}$ ) |
|---------------|----------------------|----------------------------|---------------------------|
| Wild Type     | 0.819                | 0.070                      | 0.867 $\pm$ 0.090         |
|               | 0.789                | 0.095                      |                           |
|               | 0.993                | 0.075                      |                           |
| Arg4Ala       | 2.026                | 0.149                      | 1.760 $\pm$ 0.208         |
|               | 1.520                | 0.119                      |                           |
|               | 1.732                | 0.131                      |                           |
| Cys7Ala       | 9.602                | 1.234                      | 8.56 $\pm$ 1.018          |
|               | 7.180                | 1.013                      |                           |
|               | 8.907                | 1.132                      |                           |
| Phe9Ala       | 5.085                | 0.383                      | 5.693 $\pm$ 0.511         |
|               | 6.337                | 0.369                      |                           |
|               | 5.659                | 0.363                      |                           |
| Phe9Tyr       | 0.739                | 0.011                      | 0.813 $\pm$ 0.087         |
|               | 0.766                | 0.113                      |                           |
|               | 0.936                | 0.123                      |                           |
| His22Ala      | 1.737                | 0.333                      | 1.592 $\pm$ 0.104         |
|               | 1.542                | 0.232                      |                           |
|               | 1.497                | 0.215                      |                           |
| Phe23Trp      | 0.726                | 1.043                      | 0.711 $\pm$ 0.019         |
|               | 0.72                 | 1.058                      |                           |
|               | 0.68                 | 9.132                      |                           |
| Thr91Asp      | 1.54                 | 0.164                      | 1.716 $\pm$ 0.210         |
|               | 2.01                 | 0.137                      |                           |
|               | 1.60                 | 0.158                      |                           |
| Lys92Ala      | 5.01                 | 0.596                      | 5.175 $\pm$ 0.810         |
|               | 6.24                 | 0.801                      |                           |
|               | 4.27                 | 0.917                      |                           |
| Lys150Ala     | 0.79                 | 0.092                      | 1.111 $\pm$ 0.238         |
|               | 1.37                 | 0.098                      |                           |
|               | 1.17                 | 0.096                      |                           |
| Arg151Asp     | 1.03                 | 0.067                      | 1.212 $\pm$ 0.331         |
|               | 0.93                 | 0.098                      |                           |
|               | 1.68                 | 0.125                      |                           |

**Table S1: The MST measurements of the interactions between M2-1 and SH7 RNA. Related to Figures 2 and 4.** All data were measured as triplicates through NT.115 MST instrument at room temperature.



|                   |                                 |
|-------------------|---------------------------------|
| M2-1_Arg4Ala_F:   | TCCAATGCAATGAGCAGGgcGAACCCCT    |
| M2-1_Arg4Ala_R:   | CTCGAACTTACAGGGGTTcgcCCTGCT     |
| M2-1_Cys7Ala_F:   | ATGAGCAGGAGGAACCCCGCTAAGTTC     |
| M2-1_Cys7Ala_R:   | GCCCCTGATCTCGAACTTAGCGGGGTT     |
| M2-1_Phe9Ala_F:   | AGGAGGAACCCCTGTAAGgcCGAGATC     |
| M2-1_Phe9Ala_R:   | GCAGTGGCCCCTGATCTCGgcCTTACA     |
| M2-1_Phe9Tyr_F:   | AACCCCTGTAAGTaCGAGATCAGGGGCCAC  |
| M2-1_Phe9Tyr_R:   | GCCCCTGATCTCGtACTTACAGGGGTTCT   |
| M2-1_His22Ala_F:  | CTGAACGGCAAGAGGTGCGCCTTCAGC     |
| M2-1_His22Ala_R:  | GAAGTAGTTGTGGCTGAAGGCGCACCT     |
| M2-1_Phe23Trp_F:  | AAGAGGTGCCActggAGCCACA ACTACTTC |
| M2-1_Phe23Trp_R:  | GTAGTTGTGGCTccaGTGGCACCTCTTGCC  |
| M2-1_Thr91Asp_F:  | GGCAGCATCAACAACATCgaCAAGCAG     |
| M2-1_Thr91Asp_R:  | CACACAGGCGCTCTGCTTGtcGATGTT     |
| M2-1_Lys92Ala_F:  | AACAACATCACCGgcGCAGAGCGCCTGTGTG |
| M2-1_Lys92Ala_R:  | ACAGGCGCTCTGCgcGGTGATGTTGTTGAT  |
| M2-1_Lys150Ala_F: | CAGACCATCCACCTGCTGgcGAGGCTG     |
| M2-1_Lys150Ala_R: | CACGTTCGCGGGCAGCCTCgcCAGCAG     |
| M2-1_Arg151Asp_F: | CACCTGCTGAAGgacCTGCCCGCCGACGTG  |
| M2-1_Arg151Asp_R: | GTCGGCGGGCAGgtcCTTCAGCAGGTGGAT  |

**Table S2: The primers used in the mutagenesis of the M2-1 proteins. Related to STAR Methods.** The primers are synthesized by Eurofins Genomics.
